# Supplementary material
Source: Elsevier journal article supplement (https://www.sciencedirect.com/science/article/pii/S2531137918300622)
Supplement: mmc1 [file S2531137918300622:mmc1.docx]

**Supplemental tables**

**Table S1:** Primer sequences of the *THPO* gene

| **Exon and direction** | **Sequence (5’ – 3’)** | **Annealing temperature (ºC)** | **PCR product (base pairs)** |
| --- | --- | --- | --- |
| 1 forward | TATGACCTGCTGCTGTGGAG | 60.0 | 177 |
| 1 reverse | GAGCCCATTTCTCTTTGCTG | 59.9 |  |
| 2 forward | AATTCAGGGCTTTGGCAGTT | 60.9 | 355 |
| 2 reverse | GCAGCGTGTCTCCTTTCTCT | 59.7 |  |
| 3 forward | CCTGGGTTTCAGGTCTGG | 59.0 | 298 |
| 3 reverse | GATGGTGTCTTCCTGGGAGT | 58.9 |  |
| 4 forward | CACAATACAGCCCGCATTTA | 59.6 | 287 |
| 4 reverse | AGAATCCATGGGAAGCAGTG | 60.1 |  |
| 5 forward | TTCACTCTGCTGGCTACTCCT | 59.2 | 340 |
| 5 reverse | AAGAGCCCTTCTTCCCTCAG | 59.9 |  |
| 6A forward | TGGGTACTGGCATCCTGTCT | 60.5 | 414 |
| 6A reverse | AGGGACCTGGAGGTTTGGT | 60.7 |  |
| 6B forward | AGCTCCCAAACAGGACTTCT | 57.9 | 500 |
| 6B reverse | CGGCAGTGTCTGAGAACCTT | 60.4 |  |
| 6C forward | CTACCAGCCCTCTTCTAAACAC | 62.0 | 282 |
| 6C reverse | CTGCTCTGATGAGTATTGCTGATA | 62.0 |  |
| 6D forward | AAAGGGAATCATTTTTCACTGT | 62.0 | 488 |
| 6D reverse | CTATTGCCACCCTCGAAGAA | 62.0 |  |

**Table S2:** Demographics, clinical features and *THPO* SNP carrier status of acquired aplastic anemia patients (n = 83)

| **Patient** | **Age** | **Gender** | **Race** | **Classification *** | **Death** | **BMT** | **Karyotype**  **dysfunction** | **PNH**  **clone** | **rs956732**  **C/T **** | **rs6141**  **A/G **** | **rs3804618**  **A/T **** | **Platelets ***** |
| --- | --- | --- | --- | --- | --- | --- | --- | --- | --- | --- | --- | --- |
| 1 | 14 | Male | Pardo | VSAA | No | No | No | No | 2 | 0 | 1 | 2000 |
| 2 | 23 | Male | White | VSAA | No | Yes | Yes | No | 2 | 2 | 0 | 7000 |
| 3 | 7 | Male | White | VSAA | No | No | No | No | 1 | 1 | 0 | 2000 |
| 4 | 18 | Male | White | VSAA | No | No | No | No | 1 | 0 | 0 | 2000 |
| 5 | 22 | Female | Pardo | SAA | Yes | No | No | No | 2 | 2 | 0 | 18000 |
| 6 | 14 | Male | White | SAA | No | No | No | Yes | 1 | 1 | 0 | 17000 |
| 7 | 14 | Female | White | VSAA | No | No | No | Yes | 1 | 1 | 0 | 6000 |
| 8 | 36 | Female | White | VSAA | Yes | No | Yes | No | 1 | 1 | 0 | 9000 |
| 9 | 68 | Male | Black | MAA | No | No | No | No | 2 | 2 | 0 | 46000 |
| 10 | 10 | Female | Pardo | VSAA | No | No | No | No | 1 | 1 | 0 | 6000 |
| 11 | 8 | Female | Pardo | VSAA | Yes | No | No | No | 2 | 2 | 0 | 8000 |
| 12 | 62 | Female | Black | VSAA | Yes | No | No | No | 2 | 2 | 0 | 9000 |
| 13 | 8 | Male | White | VSAA | No | No | No | No | 2 | 2 | 0 | 6000 |
| 14 | 7 | Male | White | MAA | No | No | No | No | 1 | 1 | 0 | 30000 |
| 15 | 58 | Male | White | SAA | No | No | No | No | 2 | 2 | 0 | 11000 |
| 16 | 5 | Male | Pardo | MAA | No | No | No | No | 2 | 2 | 0 | 43000 |
| 17 | 27 | Male | Black | SAA | Yes | No | No | No | 1 | 2 | 0 | 12000 |
| 18 | 42 | Female | White | VSAA | Yes | Yes | Yes | No | 1 | 2 | 0 | 5000 |
| 19 | 17 | Male | Black | VSAA | No | No | Yes | No | 2 | 2 | 0 | 1000 |
| 20 | 15 | Male | White | MAA | No | No | No | No | 1 | 1 | 0 | 85000 |
| 21 | 22 | Male | White | VSAA | No | No | No | No | 1 | 2 | 0 | 9000 |
| 22 | 18 | Male | White | MAA | No | No | No | No | 1 | 2 | 0 | 49000 |
| 23 | 28 | Female | White | VSAA | Yes | No | No | No | 1 | 2 | 0 | 7000 |
| 24 | 24 | Male | White | VSAA | Yes | No | No | No | 0 | 2 | 0 | 8000 |
| 25 | 21 | Female | White | MAA | No | No | No | No | 2 | 1 | 0 | 87000 |
| 26 | 7 | Male | White | VSAA | No | No | No | No | 1 | 0 | 1 | 7000 |
| 27 | 20 | Male | Pardo | SAA | No | Yes | No | No | 1 | 1 | 0 | 19000 |
| 28 | 43 | Female | White | SAA | No | No | No | No | 0 | 0 | 0 | 17000 |
| 29 | 29 | Male | Black | MAA | No | Yes | No | No | 0 | 1 | 0 | 80000 |
| 30 | 16 | Male | White | SAA | No | No | Yes | No | 1 | 1 | 0 | 14000 |
| 31 | 22 | Male | Black | SAA | No | Yes | No | No | 0 | 1 | 0 | 11000 |
| 32 | 54 | Male | White | VSAA | No | No | No | No | 2 | 0 | 0 | 3000 |
| 33 | 39 | Male | Pardo | VSAA | No | No | No | No | 1 | 2 | 0 | 9000 |
| 34 | 17 | Male | Pardo | VSAA | Yes | Yes | No | Yes | 1 | 1 | 0 | 7000 |
| 35 | 49 | Male | Pardo | SAA | No | No | No | No | 1 | 2 | 0 | 15000 |
| 36 | 26 | Male | White | VSAA | No | No | No | No | 2 | 2 | 0 | 3000 |
| 37 | 10 | Male | White | VSAA | No | No | No | No | 0 | 1 | 0 | 3000 |
| 38 | 12 | Male | White | MAA | No | No | No | No | 1 | 2 | 1 | 24000 |
| 39 | 42 | Male | Pardo | SAA | No | No | No | No | 2 | 2 | 0 | 13000 |
| 40 | 51 | Female | Asian | MAA | No | No | No | No | 0 | 1 | 0 | 30000 |
| 41 | 3 | Female | Black | VSAA | No | No | No | No | 0 | 2 | 0 | 9000 |
| 42 | 28 | Female | Pardo | SAA | Yes | No | No | No | 0 | 1 | 0 | 20000 |
| 43 | 22 | Female | White | VSAA | No | No | No | No | 2 | 2 | 0 | 4000 |
| 44 | 52 | Female | White | VSAA | Yes | No | No | No | 2 | 2 | 0 | 6000 |
| 45 | 20 | Male | White | SAA | Yes | Yes | No | No | 1 | 2 | 1 | 13000 |
| 46 | 14 | Male | White | VSAA | No | No | No | No | 2 | 2 | 0 | 5000 |
| 47 | 13 | Female | White | VSAA | Yes | No | No | No | 0 | 1 | 0 | 5600 |
| 48 | 11 | Female | White | VSAA | No | No | No | No | 2 | 1 | 0 | 9000 |
| 49 | 42 | Male | White | SAA | No | No | No | Yes | 1 | 2 | 0 | 17000 |
| 50 | 4 | Female | White | VSAA | Yes | Yes | No | No | 2 | 2 | 0 | 6000 |
| 51 | 10 | Male | Black | MAA | No | No | No | No | 1 | 1 | 0 | 24000 |
| 52 | 11 | Female | White | VSAA | Yes | Yes | No | No | 2 | 1 | 0 | 6000 |
| 53 | 74 | Female | White | SAA | Yes | No | No | No | 1 | 0 | 0 | 11000 |
| 54 | 47 | Female | White | SAA | No | No | No | No | 2 | 2 | 0 | 20000 |
| 55 | 26 | Female | White | VSAA | No | No | Yes | No | 2 | 1 | 0 | 4000 |
| 56 | 20 | Male | Black | VSAA | No | Yes | No | No | 1 | 2 | 0 | 4000 |
| 57 | 5 | Female | White | VSAA | No | Yes | No | No | 0 | 1 | 1 | 4000 |
| 58 | 9 | Female | White | VSAA | No | No | No | No | 1 | 2 | 0 | 7000 |
| 59 | 21 | Male | Black | MAA | No | Yes | No | No | 1 | 2 | 0 | 26000 |
| 60 | 50 | Female | White | VSAA | No | No | No | Yes | 2 | 0 | 0 | 7000 |
| 61 | 19 | Male | White | SAA | No | No | No | Yes | 1 | 2 | 0 | 13000 |
| 62 | 25 | Male | White | SAA | No | Yes | Yes | No | 1 | 2 | 0 | 12000 |
| 63 | 17 | Male | White | VSAA | No | Yes | No | No | 1 | 1 | 0 | 3000 |
| 64 | 24 | Male | White | VSAA | Yes | Yes | No | No | 2 | 1 | 0 | 7000 |
| 65 | 2 | Female | White | VSAA | No | Yes | No | No | 1 | 2 | 1 | 5000 |
| 66 | 21 | Female | Pardo | VSAA | Yes | Yes | No | No | 1 | 1 | 0 | 2000 |
| 67 | 17 | Male | White | VSAA | Yes | No | No | No | 0 | 1 | 0 | 7000 |
| 68 | 12 | Female | White | VSAA | No | No | No | No | 1 | 2 | 0 | 10000 |
| 69 | 20 | Male | White | VSAA | No | No | No | Yes | 0 | 1 | 0 | 7000 |
| 70 | 22 | Male | Black | VSAA | No | Yes | No | No | 0 | 2 | 1 | 5000 |
| 71 | 24 | Male | Black | VSAA | Yes | Yes | No | No | 0 | 1 | 1 | 3000 |
| 72 | 23 | Male | White | VSAA | No | No | No | No | 1 | 2 | 0 | 3700 |
| 73 | 21 | Female | White | VSAA | Yes | No | No | No | 1 | 2 | 0 | 1000 |
| 74 | 63 | Female | White | SAA | Yes | No | No | No | 1 | 1 | 0 | 11000 |
| 75 | 29 | Female | White | SAA | No | No | No | No | 2 | 1 | 0 | 20000 |
| 76 | 18 | Male | White | MAA | Yes | No | No | No | 2 | 2 | 0 | 99000 |
| 77 | 51 | Male | White | VSAA | No | Yes | Yes | No | 1 | 2 | 0 | 5000 |
| 78 | 29 | Female | White | VSAA | Yes | Yes | No | No | 0 | 1 | 0 | 6000 |
| 79 | 10 | Male | White | MAA | No | No | No | No | 2 | 1 | 0 | 26000 |
| 80 | 14 | Male | White | MAA | Yes | No | No | No | 0 | 1 | 0 | 27000 |
| 81 | 11 | Male | White | SAA | No | No | Yes | No | 1 | 2 | 0 | 15000 |
| 82 | 44 | Female | White | VSAA | No | No | No | No | 1 | 2 | 0 | 9000 |
| 83 | 18 | Female | Pardo | VSAA | No | No | No | Yes | 2 | 1 | 0 | 3000 |

BMT: bone marrow transplant; PNH: paroxysmal nocturnal hemoglobinuria

* Aplastic anemia classification - MAA: moderate aplastic anemia; SAA: severe aplastic anemia; VSAA: very severe aplastic anemia

** *THPO* SNPs - 0: wild-type, 1: heterozygous; 2: homozygous

*** Platelet counts at diagnosis
